# Supplementary material
Source: PubMed Central journal article supplement (PMC4334822)
Supplement: supp_jiu401_jiu401supp.pdf [file supp_jiu401_jiu401supp.pdf]

| <b>Antibodies</b>                   |                                     |
|-------------------------------------|-------------------------------------|
| Anti-human CD8, depleting (cM-T807) | Nonhuman Primate Reagent Resource   |
| Control human IgG                   | Nonhuman Primate Reagent Resource   |
| Anti-monkey CD3                     | Invitrogen, Carlsbad, CA            |
| Anti-human CD8                      | Dako, Carpinteria, CA               |
| Anti-human CD28                     | BD Biosciences, San Jose, CA        |
| Anti-human CD197                    | BD Biosciences                      |
| Anti-human Granzyme B               | Invitrogen                          |
| Anti-human IFN- $\gamma$            | BD Biosciences                      |
| Anti-human TNF- $\alpha$            | BD Biosciences                      |
| Anti-human CD163                    | Novocastra, Newcastle Upon Tyne, UK |
| Anti-human HLA-DR                   | Zymed, Camarillo, CA                |
| <b>Oligonucleotides</b>             |                                     |
| Rhesus CD163-forward                | GCCCAGAAGGAACTTGTAGC                |
| Rhesus CD163-reverse                | CACCAAGCGAATTTCTGTGT                |
| Rhesus CD163-probe                  | TGAGCAGACTACTCCAACATCCCTGC          |
| Rhesus HLA-DRalpha-forward          | TCTCAAGCACTGGGAGTTTG                |
| Rhesus HLA-DRalpha-reverse          | CACCCTTGATGATGAAGACG                |
| Rhesus HLA-DRalpha-probe            | CCCAGGGCACACACCACGTT                |
| Rhesus GAPDH-forward                | GCACCACCAACTGCTTAGCAC               |
| Rhesus GAPDH-reverse                | TCTTCTGGGTGGCAGTGATG                |
| Rhesus GAPDH-probe                  | TCGTGGAAGGACTCATGACCACAGTCC         |
| Rhesus TBP-forward                  | AAAGACCATTGCACTTCGTG                |
| Rhesus TBP-reverse                  | GGTTCGTGGCTCTCTTATCC                |
| Rhesus TBP-probe                    | TCCAAGCGGTTTGCTGCAG                 |

**Supplemental Table 1. Antibodies and oligonucleotides used for intra-CSF**

**treatment, flow cytometry, immunohistochemistry, and real-time PCR.** Antibodies for flow cytometry were directly conjugated to fluorochromes. Probes for real time PCR were labeled at the 5'-end with a reporting dye and at the 3'-end with a quencher.

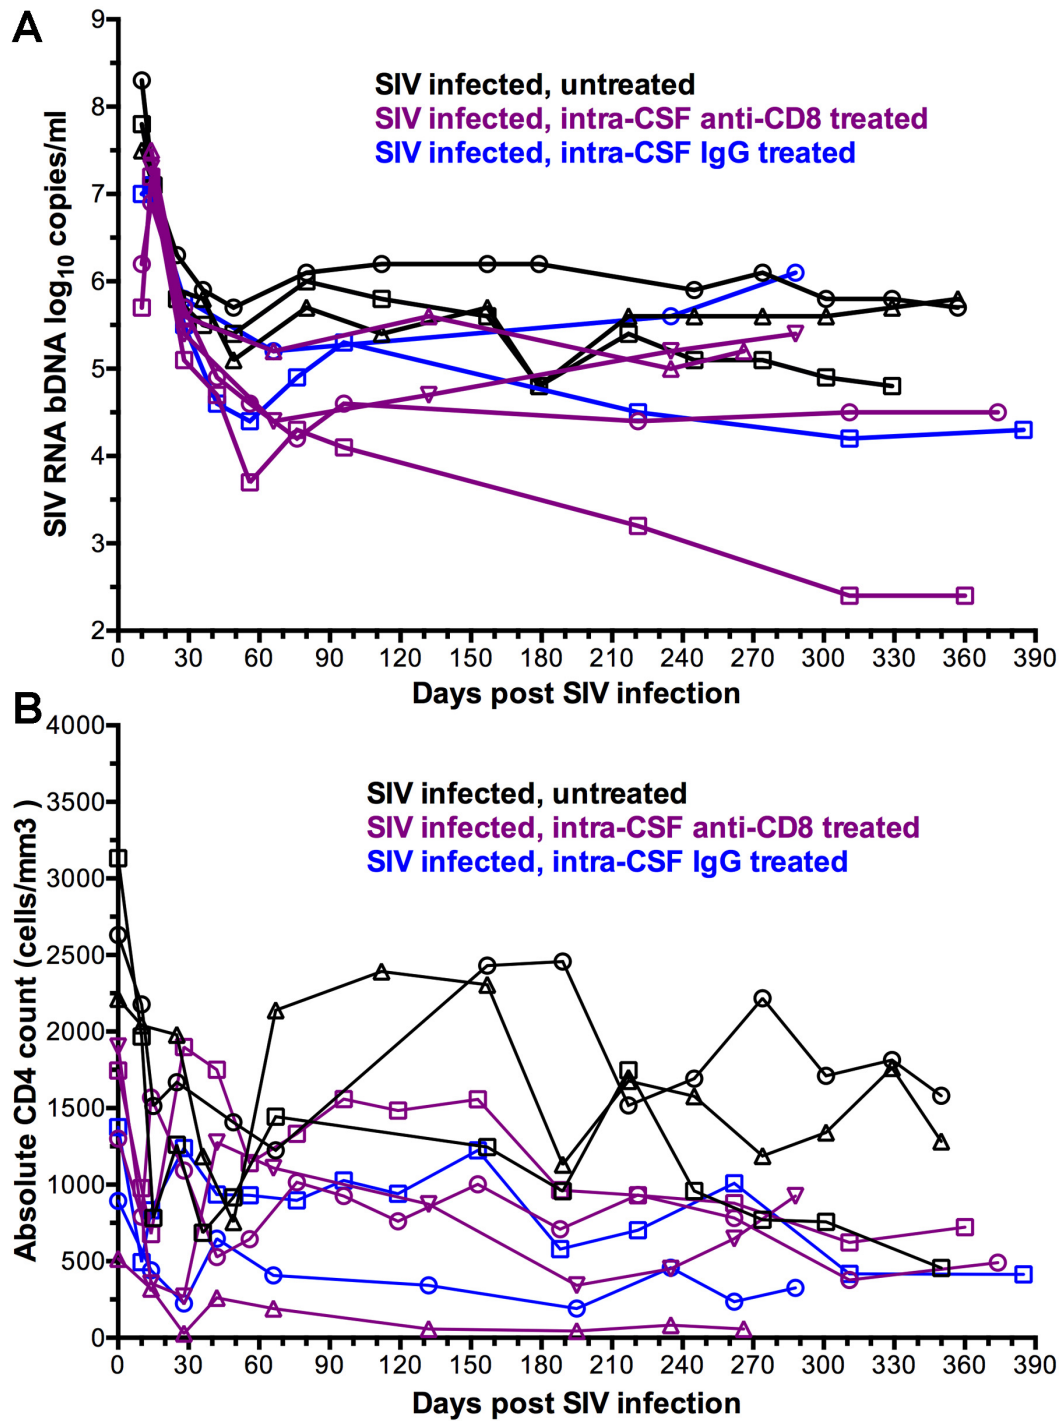

**Supplemental Figure 1. Course of chronic SIV infection for experimental and control animals. (A) Plasma viral load and (B) CD4 cell count were measured over time before the onset of experimental procedures.**

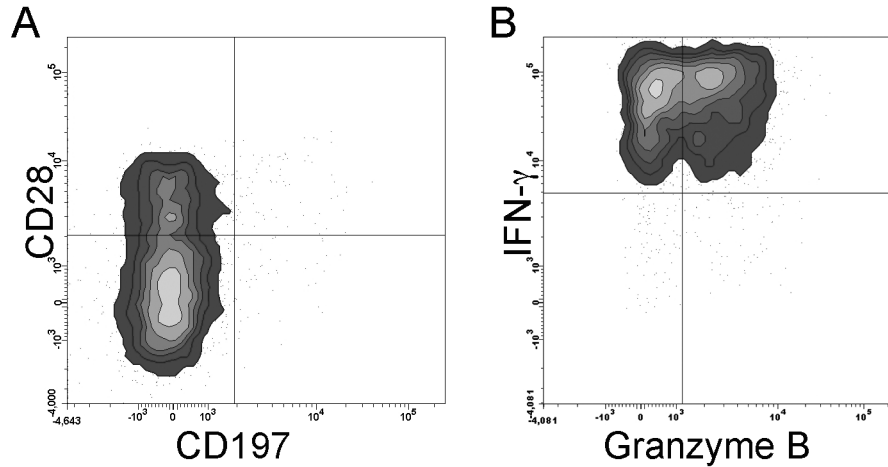

**Supplemental Figure 2.** Flow cytometry analysis for memory and effector function molecules on cells isolated from the brains of representative (of three) chronically SIV infected monkeys. (A) Surface staining for CD197 (X-axis) and CD28 (Y-axis) on gated CD3+CD8+ cells classify memory populations. (B) Intracellular staining for Granzyme B (X-axis) and IFN- $\gamma$  (Y-axis) examine effector function phenotype on stimulated, gated CD3+CD8+ cells.
